# Supplementary material for: The Arabidopsis WRINKLED1 transcription factor affects auxin homeostasis in roots
Source: Oxford University Press journal article supplement (doi:10.1093/jxb/erx275), 2017-07-20
Supplement: erx275_suppl_supplementary_figures_and_tables.pdf [file erx275_suppl_supplementary_figures_and_tables.pdf]

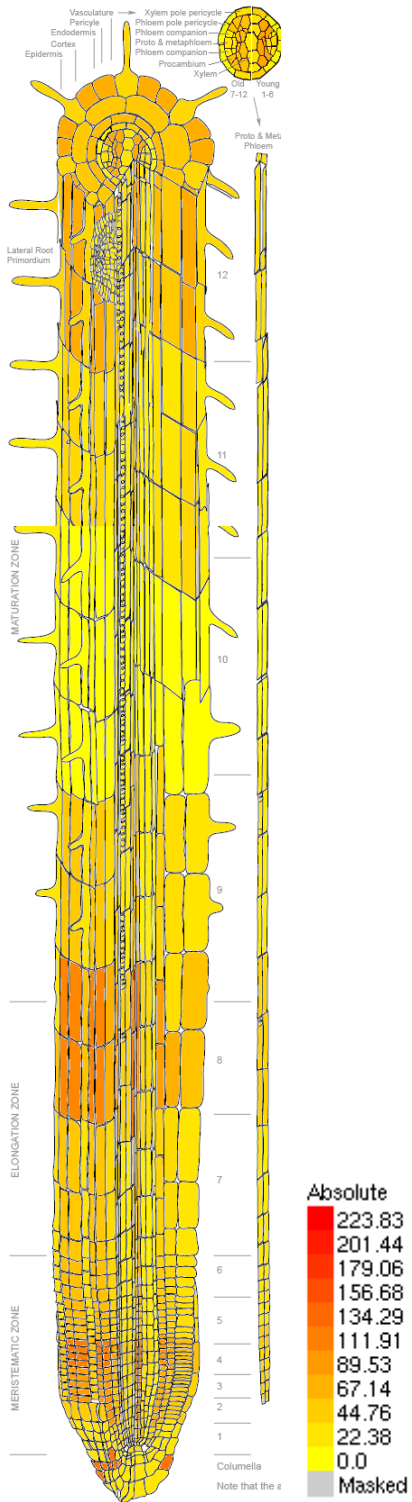

**Figure S1.** Expression profiles of *AtWR1* in Arabidopsis root. Data are obtained from the Arabidopsis eFP browser (<http://bar.utoronto.ca/efp/cgi-bin/efpWeb.cgi>).

**A**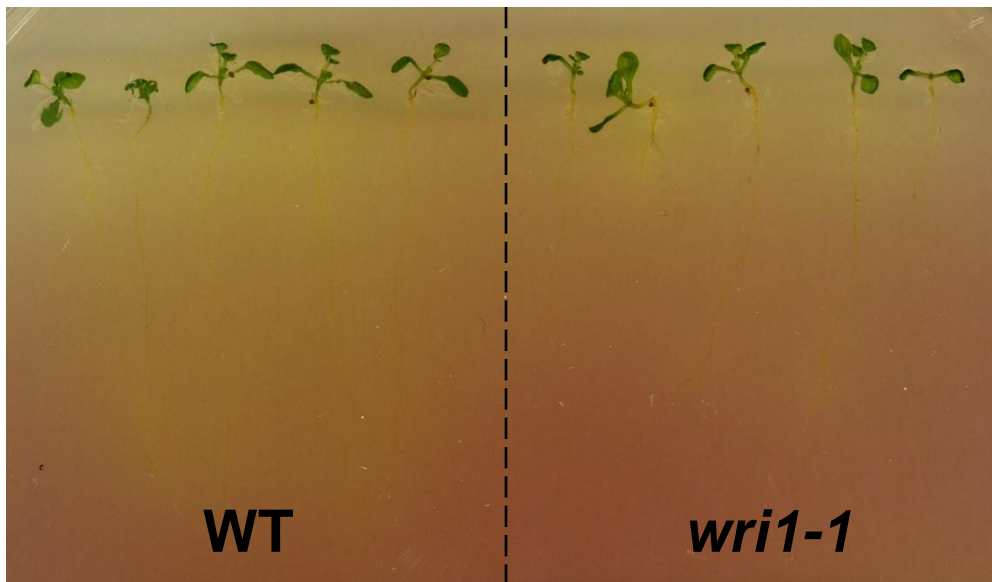**B**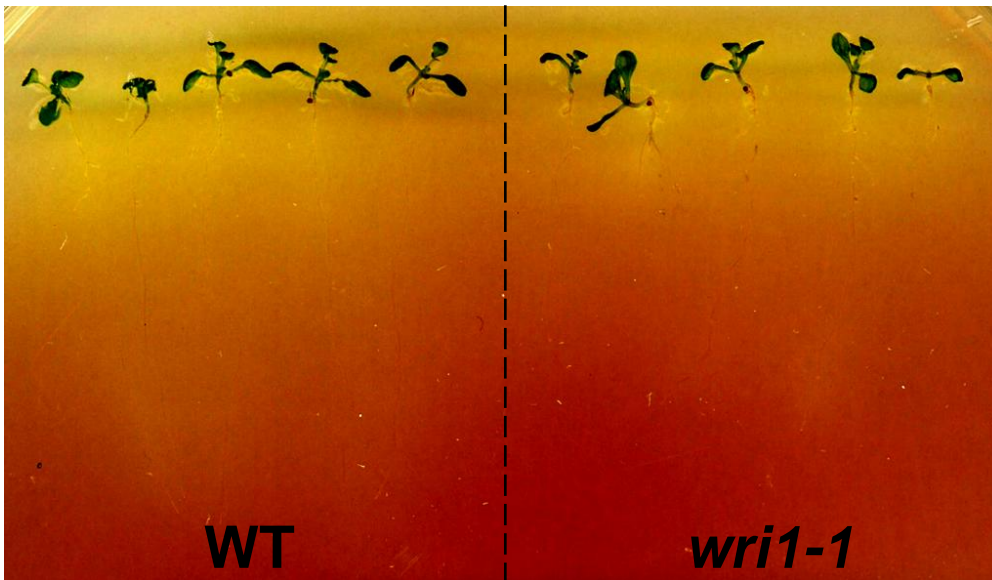

**Figure S2.** Growth phenotype of WT and *wri1-1* on pH indicator plates. **A)** Original picture of WT and *wri1-1* seedlings grown on pH indicator plates. **B)** Same picture as shown in **A)** with the contrast increased.

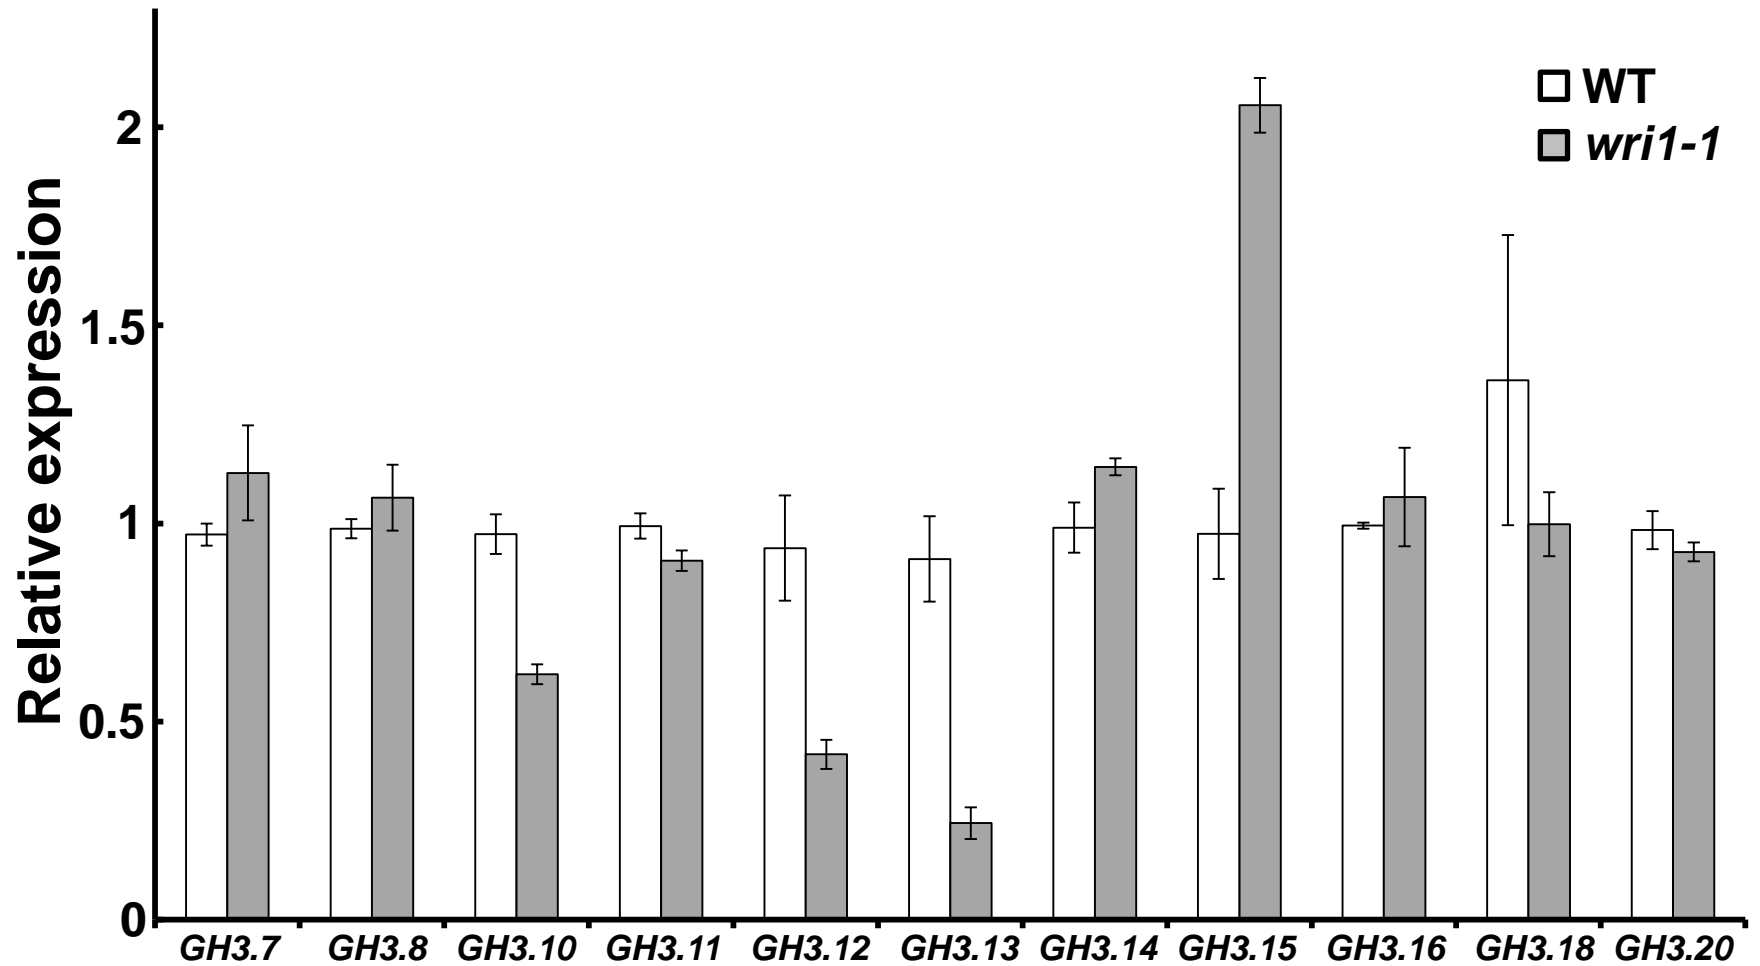

**Figure S3.** Gene expression of *GH3* genes of unknown function. *GH3* transcripts of WT and *wri1-1* plants were measured by quantitative real-time PCR. Results are shown as mean  $\pm$  SE ( $n = 3$ ).

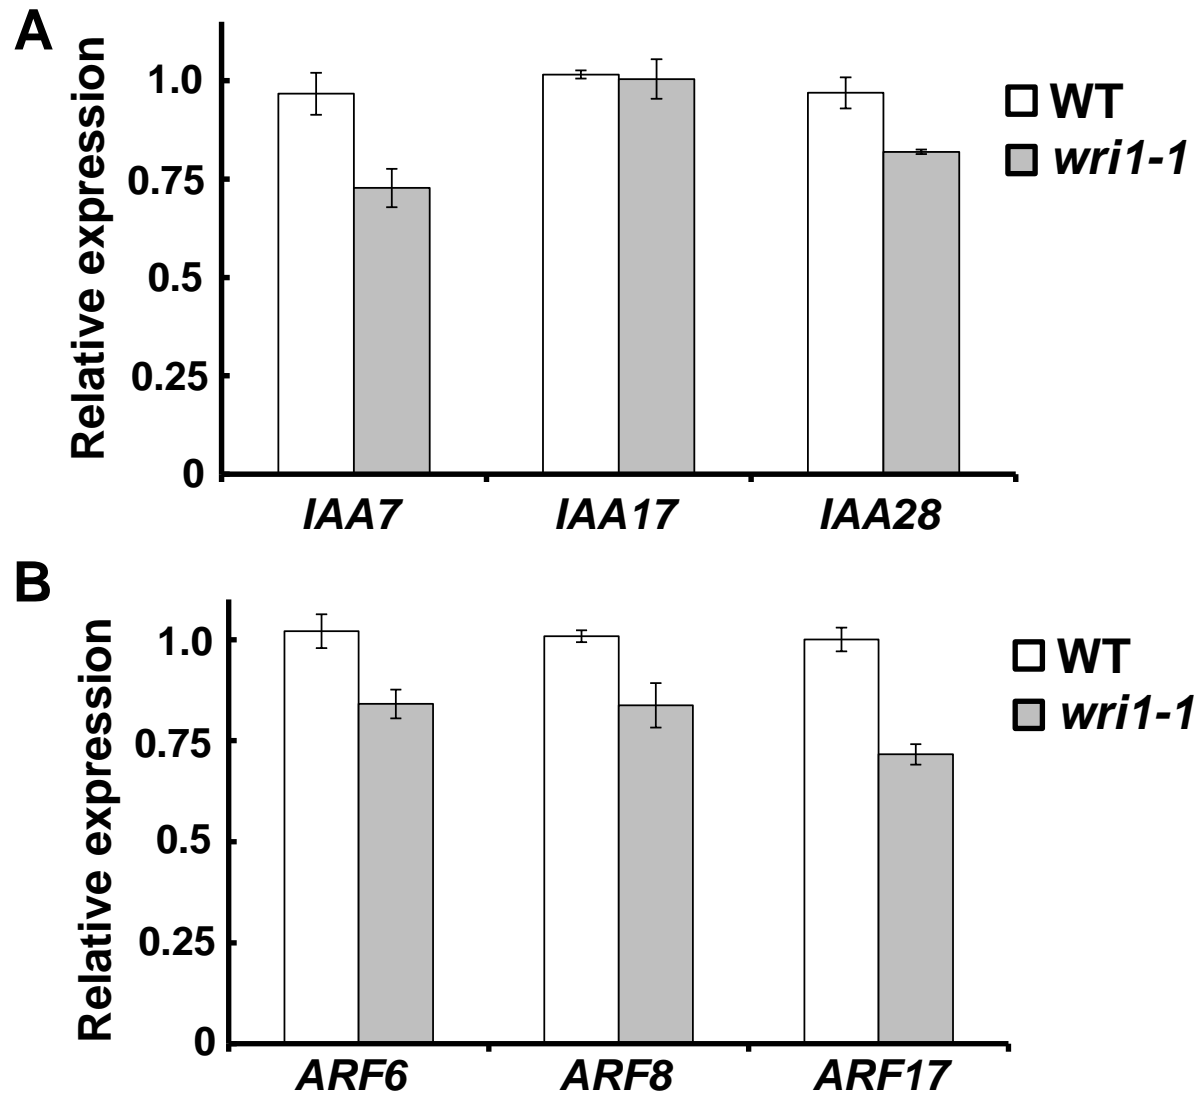

**Figure S4.** Gene expression of *IAA* and *ARF* auxin-responsive genes. **A)** *IAAs* and **B)** *ARFs* transcripts of WT and *wri1-1* plants were quantified by quantitative real-time PCR. Results are shown as mean  $\pm$  SE ( $n = 3$ ).

## A

GH3.3 Pro1 GATTAAAATGGTATTTGTAAGTGATAATATTAGACTTTGTGTTTGATGAT  
GH3.3 Pro2 AATATTAGACTTTGTGTTTGATGATGAGGAGATATTGAAACTCGACGAGT  
GH3.3 Pro3 GAGGAGATATTGAAACTCGACGAGTATGGGGTTGTATTTATAGTGGCAAG  
GH3.3 Pro4 ATGGGGTTGTATTTATAGTGGCAAGAAGGAGAAAACCAACGTCAGCCAAA  
GH3.3 Pro5 AGCCAAATTCCACGTCGACATAAAAAGTGGGCTCGGTTTGTTATCGTTAGA  
GH3.3 Pro6 TGGGCTCGGTTTGTTATCGTTAGACCGAGACAGGGGACAAGAGGGACCGC  
GH3.3 Pro7 CCGAGACAGGGGACAAGAGGGACCGCGGTCACGTAATCTTTGGCTAGTTT  
GH3.3 Pro8 AGGGACCGCGGTCACGTAATCTTTGGCTAGTTTTGGGCAGACATGTGGGACTGA  
GH3.3 Pro9 TGGGCAGACATGTGGGACTGATATGTCTGCGCCACGTTGGCATGTTACTT

## B

```
Pro1      gattaaaatggtatTTTgtaagtgataatattagactTTTgtgTTTgatgat-----  
Pro8      -----agggaccgCGGTCACGTAATCTTTggctagTTTTgggcagacatgtgggactga  
          ** *                **** * * * *      * * * **
```

**Figure S5.** Probes for the promoter of *GH3.3* used in EMSA. **A)** The DNA sequences of probes used for the EMSA are shown. **B)** Alignment of the sequences of pro1 and pro8 by CLUSTAL O program (<http://www.ebi.ac.uk/Tools/msa/clustalo/>).

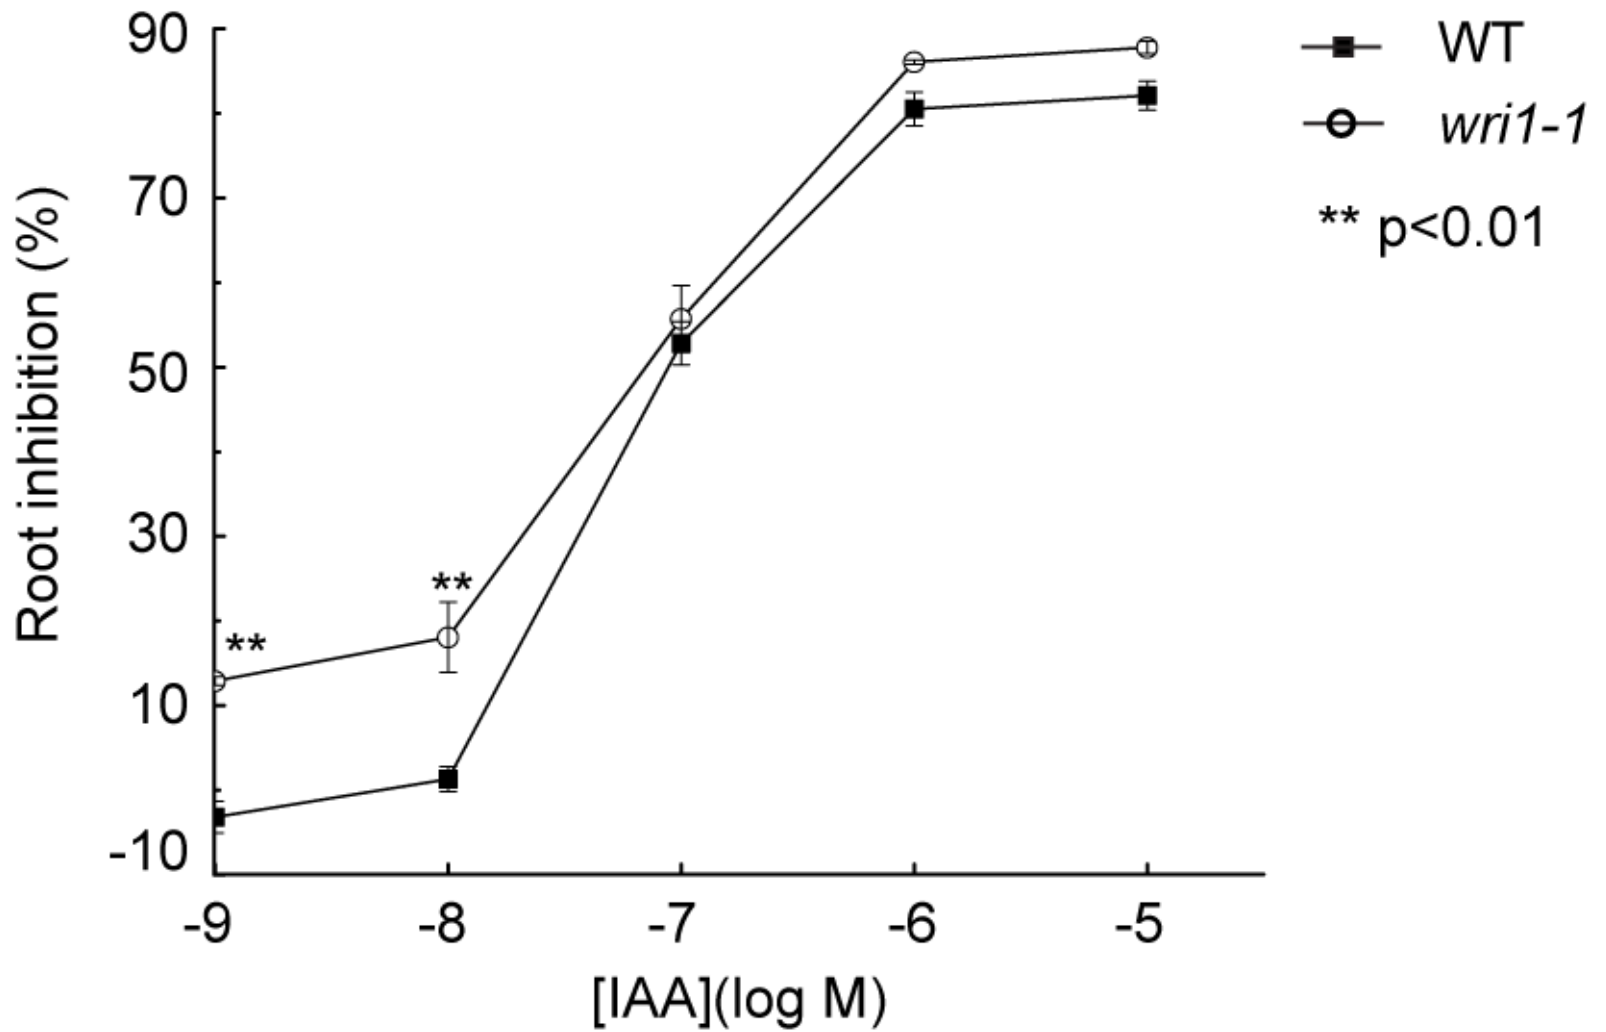

**Figure S6.** Primary root growth inhibition in response to different concentrations of IAA. 4-day-old seedlings of WT and *wri1-1* were transferred to growth media with various concentrations of IAA and continued growing for 6 days. In each experiment, 13 seedlings were measured. Results shown are based on three independent experiments as mean  $\pm$  SE (n=3). “\*\*” indicate significant difference (P<0.01, t-test) to WT.

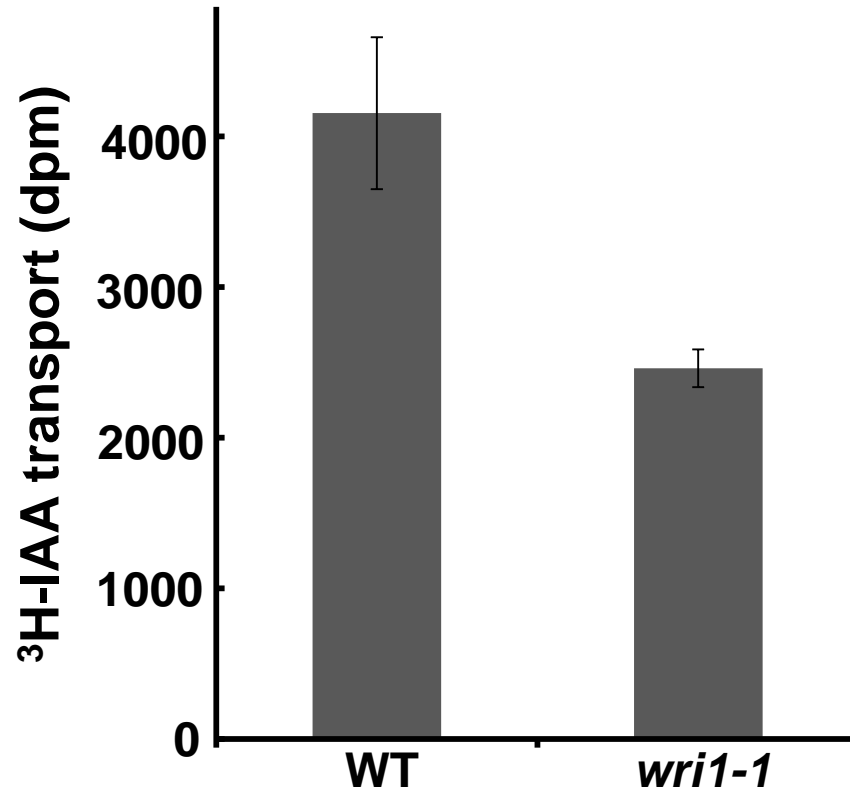

**Figure S7.** Auxin transport in roots of WT and *wri1-1*. Values are means  $\pm$  SE (n=3).

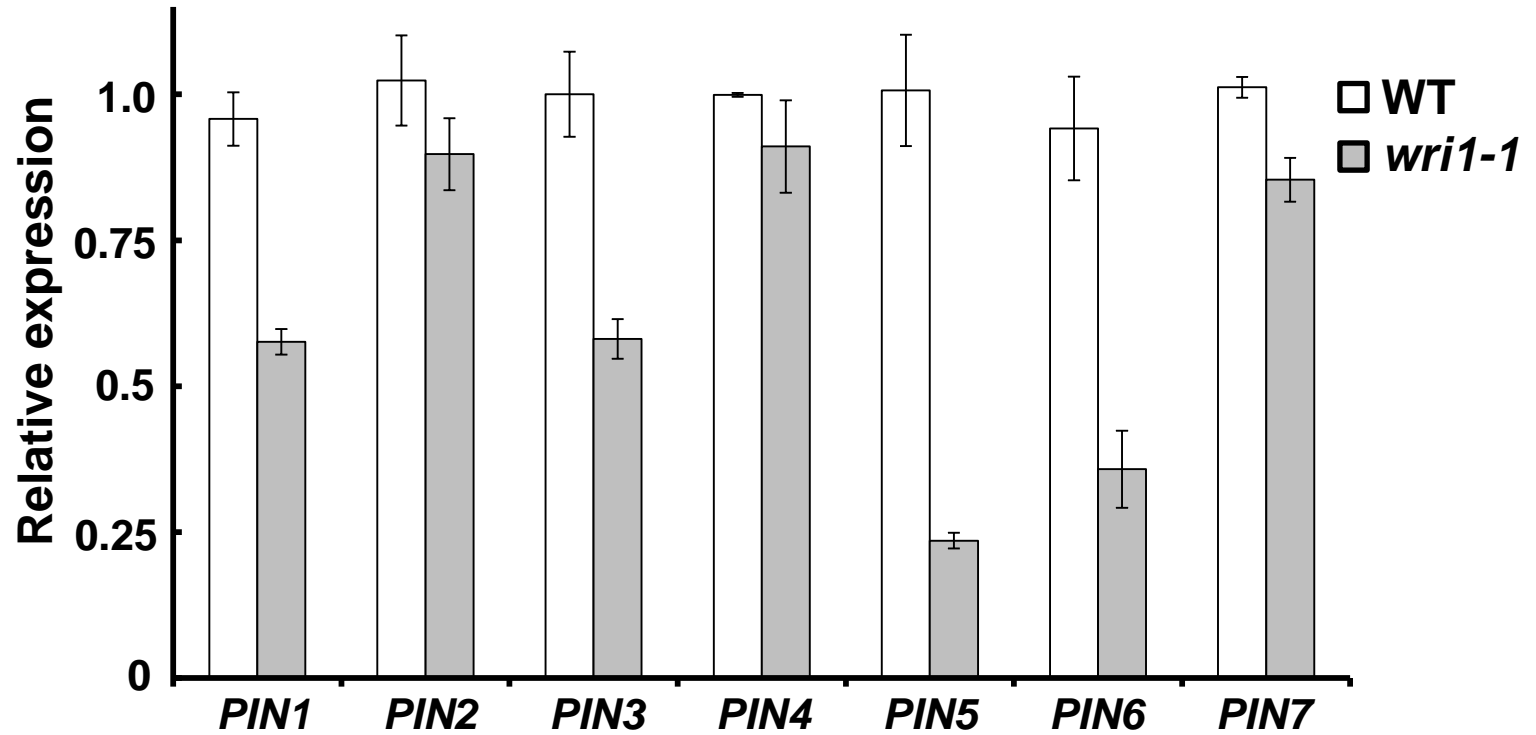

**Figure S8.** Expression of *PIN* genes. *PINs* transcripts of WT and *wri1-1* plants were quantified by quantitative real-time PCR. Results are shown as mean  $\pm$  SE (n = 3-4).



| <b>Primer Name</b> | <b>Sequence 5' to 3'</b> |
|--------------------|--------------------------|
| GH3.1-FW           | GTCCTCCTCAGCATCGACTC     |
| GH3.1-RV           | ATCGTGCTTGTGTCTGCGTA     |
| GH3.2-FW           | GCTGTTTGGAGATGGAGGAA     |
| GH3.2-RV           | CCGATCGATTTATCAGCGAC     |
| GH3.3-FW           | ATCAGTACAAGGTGCCGAGG     |
| GH3.3-RV           | AAAGCTGGGCTGAAGTGTGT     |
| GH3.4-FW           | TGGAGGAATCGCTGAACGCGG    |
| GH3.4-RV           | TGCCGTTCTGCACCACACGTA    |
| GH3.5-FW           | TACTTCAGCCCCAAGTGTCC     |
| GH3.5-RV           | TCTTCACGTTCCACATTCCA     |
| GH3.6-FW           | CTTGAGAAACATTGGCCTGAG    |
| GH3.6-RV           | CAGATTCGACGAAATCAGCA     |
| GH3.7-FW           | TGATCTGTTTAAGGCGGTGA     |
| GH3.7-RV           | TAGTGTCCCGGGATAGTGA      |
| GH3.8-FW           | GACCTTTTAAACGCGGTCAC     |
| GH3.8-RV           | GTCGTTGCGGTATTTTGCTT     |
| GH3.9-FW           | GCAGGACGAAAGAGAGATCG     |
| GH3.9-RV           | AACGACCCTCCTTGGCTTAT     |
| GH3.10-FW          | GGGAAATCAGAGGAGAAGCA     |
| GH3.10-RV          | AACGTTCCCTCGTTCCACAAC    |
| GH3.11-FW          | GTTTCATCGGCTGGACAGTTT    |
| GH3.11-RV          | TCAAACGCTGTGCTGAAGT      |
| GH3.12-FW          | AGGGAGAGGAGAAGGAGACG     |
| GH3.12-RV          | ATCGATCCGTCTTTGAATCG     |
| GH3.13-FW          | GTGTGGATTTCGTCCTCGTTT    |
| GH3.13-RV          | TCAACGGTGAAGCAACATTC     |
| GH3.14-FW          | CACTAGCCGTGTGGATTCCCT    |
| GH3.14-RV          | GCAGCATTCCCTCCAAAACAT    |
| GH3.15-FW          | CCGCGATGTTATGGAAGAAT     |
| GH3.15-RV          | CGCCAGGCTTAACAACCTTA     |
| GH3.16-FW          | GTTAAACCTGGCGCTTTTGA     |
| GH3.16-RV          | AGGCTTCTTCATGCGTCACT     |

|           |                           |
|-----------|---------------------------|
| GH3.17-FW | TCGTCTCTGCTCAGCCCATCACA   |
| GH3.17-RV | GCTGTAGAAGGCATCAACTTCGGCT |
| GH3.18-FW | ATCTCCCAAGGAGGTTTCGAT     |
| GH3.18-RV | TTTCGCTAAAGAATCGAGCAA     |
| GH3.19-FW | TGGTTCGGTTGCTCAATACA      |
| GH3.19-RV | GAGGAGGAGATTTTTGGCTGT     |
| GH3.20-FW | TTGGGGAAGGAAAAGTGATG      |
| GH3.20-RV | GATGGCCGGTTCTTGAAATA      |
| IAA7-FW   | GCCAAGCTACGAGGACAAAG      |
| IAA7-RV   | CTCTCGGAGCAAGTCCAAC       |
| IAA17-FW  | AAGACGGTGATTGGATGCTC      |
| IAA17-RV  | TCTGCTCTTGCACTTCTCCA      |
| IAA28-FW  | ATGCCGTTGACCAACTCTTC      |
| IAA28-RV  | CATCCCCGACCAGAACTTTA      |
| ARF6-FW   | AATGGGAAAAAGAGGCCTTG      |
| ARF6-RV   | ATGCGATACCGTTACCGAGA      |
| ARF8-FW   | GACCCATGGGAGTCATTTGT      |
| ARF8-RV   | TAGAGATGGGTCGGGTTTTG      |
| ARF17-FW  | GGAAATGACCTGGTTGGAAA      |
| ARF17-RV  | GACTCTTTGCTGCCATCCTC      |
| PP2A-FW   | TAACGTGGCCAAAATGATGC      |
| PP2A-RV   | GTTCTCCACAACCGCTTGGT      |
| PIN1-FW   | GGCATGGCTATGTTTCAGTCTTGGG |
| PIN1-RV   | ACGGCAGGTCCAACGACAAATC    |
| PIN2-FW   | TCACGACAACCTCGCTACTAAAGC  |
| PIN2-RV   | TGCCCATGTAAGGTGACTTTCCC   |
| PIN3-FW   | AAGGCGGAAGATCTGACCAAGG    |
| PIN3-RV   | TGCTGGATGAGCTACAGCTTTG    |
| PIN4-FW   | ACAACGTGGCAACGGAACAATC    |
| PIN4-RV   | GCCGATATCATCACCACCACTC    |
| PIN5-FW   | CCATCGGCTCTATTGTCCTTG     |
| PIN5-RV   | GCGACGAGCACAGGTAGAGA      |
| PIN6-FW   | TGGGCCGTTTTCTTCAAAGC      |
| PIN6-RV   | GATTGATCCGGCTGCTTGAC      |

|         |                          |
|---------|--------------------------|
| PIN7-FW | CGTGTGGCCATTGTTCAAGCTG   |
| PIN7-RV | CCCTGTAICTAAGATTGCGGGATG |

**Table S1. Quantitative real-time PCR primers used in this study.**

| Probe ID    | AGI       | fold change<br>(WT/ <i>wri1-1</i> ) | P.Value  | Annotation                                                                                                           |
|-------------|-----------|-------------------------------------|----------|----------------------------------------------------------------------------------------------------------------------|
| 256940_at   | At3g30720 | 0.02                                | 6.15E-12 | QQS__qua-quine starch                                                                                                |
| 265560_at   | At2g05520 | 0.29                                | 2.23E-06 | ATGRP-3_ATGRP3_GRP-3_GRP3_glycine-rich protein 3                                                                     |
| 260522_x_at | At2g41730 | 0.34                                | 4.34E-06 | unknown protein; BEST Arabidopsis thaliana protein match is:<br>unknown protein (TAIR:AT5G24640.1)                   |
| 252347_at   | At3g48130 | 0.37                                | 2.73E-06 | Ribosomal protein L13 homolog                                                                                        |
| 254150_at   | At4g24350 | 0.40                                | 4.69E-06 | Phosphorylase superfamily protein                                                                                    |
| 245076_at   | At2g23170 | 0.47                                | 1.22E-05 | GH3.3__Auxin-responsive GH3 family protein                                                                           |
| 267262_at   | At2g22990 | 0.49                                | 5.37E-06 | SCPL8_SNG1__sinapoylglucose 1                                                                                        |
| 265817_at   | At2g18050 | 0.49                                | 1.73E-05 | HIS1-3__histone H1-3                                                                                                 |
| 251799_at   | At3g55520 | 0.49                                | 1.20E-06 | FKBP-like peptidyl-prolyl cis-trans isomerase family protein                                                         |
| 258727_at   | At3g11930 | 0.50                                | 4.23E-06 | Adenine nucleotide alpha hydrolases-like superfamily protein                                                         |
| 263948_at   | At2g35980 | 0.52                                | 1.06E-05 | ATNHL10_NHL10_YLS9                                                                                                   |
| 263909_at   | At2g36490 | 0.53                                | 1.59E-05 | DML1_ROS1__demeter-like 1                                                                                            |
| 263515_at   | At2g21640 | 0.59                                | 1.16E-05 | Encodes a protein of unknown function that is a marker for oxidative<br>stress response.                             |
| 263491_at   | At2g42600 | 0.62                                | 3.40E-05 | ATPPC2_PPC2__phosphoenolpyruvate carboxylase 2                                                                       |
| 256502_at   | At1g36730 | 0.67                                | 3.97E-05 | Translation initiation factor IF2/IF5                                                                                |
| 260392_at   | At1g74030 | 1.54                                | 2.80E-05 | ENO1__enolase 1                                                                                                      |
| 257895_at   | At3g16950 | 1.57                                | 3.83E-05 | LPD1_ptlpd1__lipoamide dehydrogenase 1                                                                               |
| 245220_at   | At1g59171 | 1.58                                | 2.84E-05 | Inositol-pentakisphosphate 2-kinase family protein                                                                   |
| 249384_at   | At5g39890 | 1.61                                | 1.00E-05 | Plant cysteine oxidase 2                                                                                             |
| 254845_at   | At4g11820 | 1.61                                | 2.45E-05 | HMGS_MVA1__hydroxymethylglutaryl-CoA synthase / HMG-CoA<br>synthase / 3-hydroxy-3-methylglutaryl coenzyme A synthase |
| 259969_at   | At1g76550 | 1.62                                | 2.47E-05 | Phosphofructokinase family protein                                                                                   |
| 262157_at   | At1g52670 | 1.65                                | 7.88E-06 | BCCP-like protein1, BLP1                                                                                             |
| 255558_at   | At4g01900 | 1.65                                | 4.00E-05 | GLB1_PII__GLNB1 homolog                                                                                              |
| 256160_at   | At1g30120 | 1.69                                | 7.58E-06 | PDH-E1 BETA__pyruvate dehydrogenase E1 beta                                                                          |
| 259095_at   | At3g05020 | 1.70                                | 1.68E-05 | ACP_ACP1__acyl carrier protein 1                                                                                     |
| 266426_x_at | At2g07140 | 1.71                                | 5.92E-06 | F-box and associated interaction domains-containing protein                                                          |
| 266426_x_at | At3g44120 | 1.71                                | 5.92E-06 | Phosphoenolpyruvate/phosphate translocator                                                                           |

|             |                                                  |      |          |                                                                                                                                                                                                                                                                                                                                                              |
|-------------|--------------------------------------------------|------|----------|--------------------------------------------------------------------------------------------------------------------------------------------------------------------------------------------------------------------------------------------------------------------------------------------------------------------------------------------------------------|
| 249366_at   | At5g40610                                        | 1.72 | 2.42E-06 | NAD-dependent glycerol-3-phosphate dehydrogenase family protein                                                                                                                                                                                                                                                                                              |
| 258086_at   | At3g25860                                        | 1.73 | 6.88E-06 | LTA2_PLE2__2-oxoacid dehydrogenases acyltransferase family protein                                                                                                                                                                                                                                                                                           |
| 258485_at   | At3g02630                                        | 1.80 | 1.02E-05 | Plant stearoyl-acyl-carrier-protein desaturase family protein                                                                                                                                                                                                                                                                                                |
| 264419_s_at | At1g43310                                        | 1.80 | 1.42E-05 | Nucleotide-sugar transporter family protein                                                                                                                                                                                                                                                                                                                  |
| 264419_s_at | At5g33320                                        | 1.80 | 1.42E-05 | Phosphoenolpyruvate/phosphate translocator                                                                                                                                                                                                                                                                                                                   |
| 247345_at   | At5g63760                                        | 1.88 | 1.51E-06 | ARI15_ATARI15__RING/U-box superfamily protein                                                                                                                                                                                                                                                                                                                |
| 248903_at   | At5g46290                                        | 1.89 | 1.54E-05 | KAS I_KAS1__3-ketoacyl-acyl carrier protein synthase I                                                                                                                                                                                                                                                                                                       |
| 248690_at   | At5g48230                                        | 1.90 | 2.65E-05 | ACAT2_EMB1276__acetoacetyl-CoA thiolase 2                                                                                                                                                                                                                                                                                                                    |
| 266035_at   | At2g05990                                        | 1.93 | 2.14E-06 | ENR1_MOD1__enoyl-ACP reductase                                                                                                                                                                                                                                                                                                                               |
| 246565_at   | At5g15530                                        | 1.95 | 4.07E-06 | BCCP2_CAC1-B__biotin carboxyl carrier protein 2                                                                                                                                                                                                                                                                                                              |
| 249490_s_at | At5g39110<br>At5g39120<br>At5g39150<br>At5g39180 | 2.06 | 2.16E-05 | RmlC-like cupins superfamily protein                                                                                                                                                                                                                                                                                                                         |
| 260982_at   | At1g53520                                        | 2.08 | 1.62E-06 | Fatty acid binding protein                                                                                                                                                                                                                                                                                                                                   |
| 265843_at   | At2g35690                                        | 2.11 | 9.09E-07 | ACX5__acyl-CoA oxidase 5                                                                                                                                                                                                                                                                                                                                     |
| 252863_at   | At4g39800                                        | 2.11 | 1.17E-06 | ATIPS1_ATMIPS1_MI-1-P SYNTHASE_MIPS1__myo-inositol-1-phosphate synthase 1                                                                                                                                                                                                                                                                                    |
| 253660_at   | At4g30140                                        | 2.17 | 2.09E-05 | CDEF1__GDSL-like Lipase/Acylhydrolase superfamily protein                                                                                                                                                                                                                                                                                                    |
| 249474_s_at | At5g39130<br>At5g39160<br>At5g39190              | 2.19 | 1.97E-05 | RmlC-like cupins superfamily protein                                                                                                                                                                                                                                                                                                                         |
| 251378_at   | At3g60660                                        | 2.42 | 1.12E-07 | unknown protein; CONTAINS InterPro DOMAIN/s: Protein of unknown function DUF1395 (InterPro:IPR009829)                                                                                                                                                                                                                                                        |
| 250472_at   | At5g10210                                        | 2.43 | 1.99E-05 | CONTAINS InterPro DOMAIN/s: C2 calcium-dependent membrane targeting (InterPro:IPR000008); BEST Arabidopsis thaliana protein match is: unknown protein (TAIR:AT5G65030.1); Has 1807 Blast hits to 1807 proteins in 277 species: Archae - 0; Bacteria - 0; Metazoa - 736; Fungi - 347; Plants - 385; Viruses - 0; Other Eukaryotes - 339 (source: NCBI BLink). |
| 261335_at   | At1g44800                                        | 2.43 | 3.45E-05 | nodulin MtN21 /EamA-like transporter family protein                                                                                                                                                                                                                                                                                                          |

|           |           |      |          |                                                                   |
|-----------|-----------|------|----------|-------------------------------------------------------------------|
| 259813_at | At1g49860 | 2.44 | 1.65E-05 | ATGSTF14_GSTF14__glutathione S-transferase (class phi) 14         |
| 260475_at | At1g11080 | 2.47 | 3.50E-05 | scpl31__serine carboxypeptidase-like 31                           |
| 264014_at | At2g21210 | 2.65 | 2.43E-05 | SAUR-like auxin-responsive protein family                         |
| 249675_at | At5g35940 | 2.88 | 5.49E-07 | Mannose-binding lectin superfamily protein                        |
| 267626_at | At2g42250 | 3.27 | 5.72E-06 | CYP712A1__cytochrome P450, family 712, subfamily A, polypeptide 1 |
| 245571_at | At4g14695 | 3.47 | 7.79E-07 | Uncharacterised protein family (UPF0041)                          |

**Table S2.** Genes expressed differently in roots of *wri1-1* compared to WT plants in microarray analysis.
